# Supplementary material for: Inorganic interpretation of luminescent materials encountered by the Perseverance rover on Mars
Source: PubMed Central journal article supplement (PMC11423895; doi:10.1126/sciadv.adm8241), 2024-09-25

Supplementary Materials for  
**Inorganic interpretation of luminescent materials encountered by the  
Perseverance rover on Mars**

Eva L. Scheller *et al.*

Corresponding author: Eva L. Scheller, [eschelle@mit.edu](mailto:eschelle@mit.edu)

*Sci. Adv.* **10**, eadm8241 (2024)  
DOI: 10.1126/sciadv.adm8241

**This PDF file includes:**

Supplementary Text  
Figs. S1 to S13  
Tables S1 to S3

## Supplementary Text

This document includes the following:

- (1) Further description of laboratory spectra of NWA 10922 in section: Unmixing Ce<sup>3+</sup> and organic contamination in Northwest Africa (NWA) 10922.
- (2) Detailed file list for all data used in the manuscript in section: List of data files available on the PDS.
- (3) Fig. S1 to S3 include further data analysis figures from NWA 10922.
- (4) Fig. S4 to S13 and Table S1 to S3 include supplementary data analysis results and methodology figures from processing of the SHERLOC dataset mentioned in the main text.

### Unmixing Ce<sup>3+</sup> and organic contamination in Northwest Africa (NWA) 10922

In this section, we summarize further analyses performed to constrain the organic versus inorganic nature of luminescence in the NWA 10922 meteorite. All spectra taken from NWA 10922 contain a G-band related to terrestrial organic contamination (Fig. S2). This is expected due to terrestrial organic contamination. We discuss what luminescence features were found in NWA 10922 and whether these were organic or inorganic.

*Phosphate grains and FTP clasts:* Through the following series of arguments, we find clear evidence of inorganic 330-350 nm luminescence from Ce<sup>3+</sup> in all phosphate grains measured in the meteorite. The main 330-350 nm broad luminescence from phosphate grains is resulting from Ce<sup>3+</sup> and not terrestrial organic contamination through the following arguments: (1) The luminescence is markedly stronger when compared with luminescence from matrix, feldspars, and pyroxenes (Fig. S1). (2) The luminescence matches that of phosphate standards measured in (13). (3) The luminescence is also consistent with the expected two Ce<sup>3+</sup> electron transition bands ( $5d \rightarrow {}^2F_{5/2}, {}^2F_{7/2}$  (4f)) that are expected for the Ca(I) site in apatite (39-40,49-50) (Fig. S2-S3). (4) Furthermore, the 330-350 nm luminescence intensity is linearly correlated with phosphate Raman peak intensity (Fig. 4D) and occurred when high phosphorous content was measured by XRF (Fig. 4A). 330-350 nm luminescence had no linear correlation with G-band intensity ( $R^2 = 0.03$ ).

Given the asymmetry of the luminescence band, it is possible that there are additional bands ~450 nm (Fig. S3). Such a ~450 nm band would pose a degeneracy in the dataset due to the fact that macromolecular organic compounds, typical of terrestrial organic contamination, fluoresce in that wavelength (41), and the fact that a ~450 nm band is also expected for Ce<sup>3+</sup> luminescence in the Ca(II) site in apatite (39). The intensity of the luminescence at 450 nm did not have a linear correlation with G-band intensity ( $R^2 = 0.2$ ) or phosphate intensity ( $R^2 = 0.1$ ). Hence, it cannot be resolved what is responsible for ~450 nm luminescence in phosphate grains,

although we prefer the interpretation that it is predominantly due to the terrestrial organic contamination (read below). There is also a minor unassigned 280 nm luminescence band, which appears similar to that observed in the Martian targets when low-intensity 280-290 nm luminescence and high-intensity 330-350 nm luminescence co-occurs.

*Matrix, pyroxene, feldspar:* Weak luminescence signals from matrix materials, pyroxenes, and feldspar are more difficult to constrain. We discuss possibilities for their origin in the below. Luminescence spectral profiles of matrix, plagioclase, and pyroxenes were largely similar and showed a band at both 330-350 nm and 410-430 nm (Fig. S2). The position of the 330-350 nm luminescence band is downshifted to ~330 nm. This is more typical of Ce<sup>3+</sup> in monazite than in apatite (50) but can also occur in other minerals depending on the exact chemistry (e.g., Fig. 1). The 330-350 nm luminescence intensity showed no linear correlation to G-band intensity for any of these phases ( $R^2=0.08$ ). Hence, we suggest that this less intense 330-350 nm luminescence is likely not related to terrestrial organic contamination but instead arises from small components of phosphates and/or other unresolved Ce<sup>3+</sup>-containing minerals included in the matrix. The shift in wavelength position would suggest that the chemistry of the matrix Ce-bearing phase is different when compared with the phosphate grains (Fig. S2). In the case of measured pyroxene and plagioclase grains, we pose that the laser cannot avoid interaction with matrix phosphates when considering the ~75  $\mu$ m spot size. The 410-430 nm luminescence intensity showed a slight correlation with G-band intensity in both matrix, pyroxenes, and feldspar ( $R^2 = 0.4-0.5$ ). Hence, we suggest that at least part of 410-430 nm luminescence is from terrestrial organic contamination like observations in (41).

#### List of data files available on the PDS

The Mars 2020 filename scheme is described in the EDR and RDR Software Interface Specification documents for PIXL and SHERLOC:

[https://pds-geosciences.wustl.edu/m2020/urn-nasa-pds-mars2020\\_pixl/document/](https://pds-geosciences.wustl.edu/m2020/urn-nasa-pds-mars2020_pixl/document/)

[https://pds-geosciences.wustl.edu/m2020/urn-nasa-pds-mars2020\\_sherloc/document/](https://pds-geosciences.wustl.edu/m2020/urn-nasa-pds-mars2020_sherloc/document/)

Importantly, the filename product ID (characters 24-26) describe the content of the file. PIXL files with the RXL product ID contain X-ray beam location data. PIXL files with the RFS product ID contain the PIXL histograms. PIXL quantification results are located in PIXL files with the RQC product ID. SHERLOC files with the RLS product ID contain data on the SHERLOC laser spot locations. SHERLOC files with the ERA and ERB product IDs contain the raw active and dark frame spectral data. SHERLOC files with the EPA product ID contain the laser photodiode data used to conduct laser normalization. A full list of data files can be found in the supplement.

PIXL Data Files ([https://pds-geosciences.wustl.edu/m2020/urn-nasa-pds-mars2020\\_pixl/](https://pds-geosciences.wustl.edu/m2020/urn-nasa-pds-mars2020_pixl/)):

#### **Bellegarde**

pe\_\_0186\_0683483744\_000rxl\_\_00700000699274310005\_\_\_j07.csv

ps\_\_0186\_0683484569\_000rfs\_\_00700000699274310006\_\_j02.csv  
ps\_\_0187\_0683484569\_000rqc\_\_00700000699274310000\_\_j01.csv

### **Montpezat**

pe\_\_0347\_0697753955\_000rxl\_\_00929821225528370003\_\_j06.csv  
ps\_\_0347\_0697754703\_000rfs\_\_00929821225528370004\_\_j04.csv  
ps\_\_0347\_0697754703\_000rqc\_\_00929821225528370000\_\_j01.csv  
pe\_\_0349\_0697957194\_000rxl\_\_00929821235358790003\_\_j05.csv  
ps\_\_0349\_0697957949\_000rfs\_\_00929821235358790004\_\_j02.csv  
ps\_\_0349\_0697957949\_000rqc\_\_00929821235358790000\_\_j01.csv

### **Alfalfa**

pe\_\_0369\_0699718372\_000rxl\_\_01101081307448340003\_\_j04.csv  
ps\_\_0369\_0699719245\_000rfs\_\_01101081307448340004\_\_j02.csv  
ps\_\_0369\_0699719245\_000rqc\_\_01101081307448340000\_\_j01.csv

### **Dourbes**

pe\_\_0257\_0689790062\_000rxl\_\_00800000890639430006\_\_j07.csv  
ps\_\_0257\_0689790785\_000rfs\_\_00800000890639430007\_\_j02.csv  
ps\_\_0257\_0689790785\_000rqc\_\_00800000890639430000\_\_j01.csv  
pe\_\_0269\_0690860057\_000rxl\_\_00800000932582450003\_\_j08.csv  
ps\_\_0269\_0690861528\_000rfs\_\_00800000932582450004\_\_j04.csv  
ps\_\_0270\_0690861528\_000rqc\_\_00800000932582450000\_\_j01.csv

### **Quartier**

pe\_\_0293\_0692986008\_000rxl\_\_00900001013847110008\_\_j06.csv  
ps\_\_0293\_0692986818\_000rfs\_\_00900001013847110009\_\_j02.csv  
ps\_\_0294\_0692986818\_000rqc\_\_00900001013847110000\_\_j01.csv  
pe\_\_0300\_0693591971\_000rxl\_\_00900001042027530003\_\_j04.csv  
ps\_\_0300\_0693593437\_000rfs\_\_00900001042027530004\_\_j02.csv  
ps\_\_0301\_0693593437\_000rqc\_\_00900001042027530000\_\_j01.csv

### **Thornton Gap**

pe\_\_0484\_0709915608\_000rxl\_\_02610041686246450004\_\_j06.csv  
ps\_\_0484\_0709916480\_000rfs\_\_02610041686246450005\_\_j02.csv  
ps\_\_0484\_0709916378\_000rqc\_\_02610041686246450000\_\_j01.csv  
pe\_\_0490\_0710394319\_000rxl\_\_02610041707217930003\_\_j04.csv  
ps\_\_0490\_0710395021\_000rfs\_\_02610041707217930004\_\_j02.csv  
ps\_\_0490\_0710394904\_000rqc\_\_02610041707217930000\_\_j01.csv

### **Berry Hollow**

pe\_\_0505\_0711805127\_000rxl\_\_02612221760302130003\_\_j04.csv  
ps\_\_0505\_0711805999\_000rfs\_\_02612221760302130004\_\_j02.csv  
ps\_\_0505\_0711805893\_000rqc\_\_02612221760302130000\_\_j01.csv  
pe\_\_0507\_0711981970\_000rxl\_\_02612221768821770004\_\_j03.csv  
ps\_\_0507\_0711982738\_000rfs\_\_02612221768821770006\_\_j03.csv

ps\_\_0507\_0711982637\_000rqc\_\_02612221768821770000\_\_j01.csv

SHERLOC Data Files ([https://pds-geosciences.wustl.edu/m2020/urn-nasa-pds-mars2020\\_sherloc](https://pds-geosciences.wustl.edu/m2020/urn-nasa-pds-mars2020_sherloc)):

### **Bellegarde**

HDR 1:

SS\_\_0186\_0683476721\_690EPA\_\_0070000SRLC10500\_108\_\_J04.CSV  
SS\_\_0186\_0683476721\_690ERA\_\_0070000SRLC10500\_108\_\_J04.CSV  
SS\_\_0186\_0683476721\_690ERB\_\_0070000SRLC10500\_108\_\_J04.CSV  
ss\_\_0186\_0683476721\_690rls\_\_0070000srlc10500\_108\_\_j04.csv

HDR 2:

SS\_\_0186\_0683477446\_620EPA\_\_0070000SRLC10500\_208\_\_J04.CSV  
SS\_\_0186\_0683477446\_620ERA\_\_0070000SRLC10500\_208\_\_J04.CSV  
SS\_\_0186\_0683477446\_620ERB\_\_0070000SRLC10500\_208\_\_J04.CSV  
ss\_\_0186\_0683477446\_620rls\_\_0070000srlc10500\_208\_\_j04.csv

Survey:

SS\_\_0186\_0683478599\_650EPA\_\_0070000SRLC11420\_108\_\_J10.CSV  
SS\_\_0186\_0683478599\_650ERA\_\_0070000SRLC11420\_108\_\_J10.CSV  
SS\_\_0186\_0683478599\_650ERB\_\_0070000SRLC11420\_108\_\_J10.CSV  
s\_\_0186\_0683478599\_650rls\_\_0070000srlc11420\_108\_\_j10.csv

### **Montpezat**

HDR (part a):

SS\_\_0349\_0697951251\_495EPA\_\_0092982SRLC11360\_108\_\_J02.CSV  
SS\_\_0349\_0697951251\_495ERA\_\_0092982SRLC11360\_108\_\_J02.CSV  
SS\_\_0349\_0697951251\_495ERB\_\_0092982SRLC11360\_108\_\_J02.CSV  
ss\_\_0349\_0697951251\_495rls\_\_0092982srlc11360\_108\_\_j02.csv

HDR (part b):

SS\_\_0349\_0697951900\_355EPA\_\_0092982SRLC11360\_208\_\_J02.CSV  
SS\_\_0349\_0697951900\_355ERA\_\_0092982SRLC11360\_208\_\_J02.CSV  
SS\_\_0349\_0697951900\_355ERB\_\_0092982SRLC11360\_208\_\_J02.CSV  
ss\_\_0349\_0697951900\_355rls\_\_0092982srlc11360\_208\_\_j02.csv

survey:

SS\_\_0349\_0697952686\_570EPA\_\_0092982SRLC11420\_108\_\_J07.CSV  
SS\_\_0349\_0697952686\_570ERA\_\_0092982SRLC11420\_108\_\_J07.CSV  
SS\_\_0349\_0697952686\_570ERB\_\_0092982SRLC11420\_108\_\_J07.CSV  
ss\_\_0349\_0697952686\_570rls\_\_0092982srlc11420\_108\_\_j07.csv

### **Alfalfa**

HDR (part a):

SS\_\_0370\_0699813450\_405EPA\_\_0110108SRLC11360\_108\_\_J02.CSV  
SS\_\_0370\_0699813450\_405ERA\_\_0110108SRLC11360\_108\_\_J02.CSV

SS\_\_0370\_0699813450\_405ERB\_\_0110108SRLC11360\_108\_\_J02.CSV  
ss\_\_0370\_0699813450\_405rls\_\_0110108srlc11360\_108\_\_j02.csv

HDR (part b):

SS\_\_0370\_0699814099\_215EPA\_\_0110108SRLC11360\_208\_\_J02.CSV  
SS\_\_0370\_0699814099\_215ERA\_\_0110108SRLC11360\_208\_\_J02.CSV  
SS\_\_0370\_0699814099\_215ERB\_\_0110108SRLC11360\_208\_\_J02.CSV  
ss\_\_0370\_0699814099\_215rls\_\_0110108srlc11360\_208\_\_j02.csv

survey:

SS\_\_0370\_0699814879\_265EPA\_\_0110108SRLC11420\_108\_\_J07.CSV  
SS\_\_0370\_0699814879\_265ERA\_\_0110108SRLC11420\_108\_\_J07.CSV  
SS\_\_0370\_0699814879\_265ERB\_\_0110108SRLC11420\_108\_\_J07.CSV  
ss\_\_0370\_0699814879\_265rls\_\_0110108srlc11420\_108\_\_j07.csv

**Garde**

HDR 1 (part a):

SS\_\_0207\_0685346165\_825EPA\_\_0071836SRLC10501\_108\_\_J03.CSV  
SS\_\_0207\_0685346165\_825ERA\_\_0071836SRLC10501\_108\_\_J03.CSV  
SS\_\_0207\_0685346165\_825ERB\_\_0071836SRLC10501\_108\_\_J03.CSV  
ss\_\_0207\_0685346165\_825rls\_\_0071836srlc10501\_108\_\_j03.csv

HDR 1 (part b):

SS\_\_0207\_0685346814\_725EPA\_\_0071836SRLC10501\_208\_\_J03.CSV  
SS\_\_0207\_0685346814\_725ERA\_\_0071836SRLC10501\_208\_\_J03.CSV  
SS\_\_0207\_0685346814\_725ERB\_\_0071836SRLC10501\_208\_\_J03.CSV  
ss\_\_0207\_0685346814\_725rls\_\_0071836srlc10501\_208\_\_j03.csv

HDR 2 (part a):

SS\_\_0207\_0685347508\_570EPA\_\_0071836SRLC10501\_108\_\_J03.CSV  
SS\_\_0207\_0685347508\_570ERA\_\_0071836SRLC10501\_108\_\_J03.CSV  
SS\_\_0207\_0685347508\_570ERB\_\_0071836SRLC10501\_108\_\_J03.CSV  
ss\_\_0207\_0685347508\_570rls\_\_0071836srlc10501\_108\_\_j03.csv

HDR 2 (part b):

SS\_\_0207\_0685348158\_025EPA\_\_0071836SRLC10501\_208\_\_J03.CSV  
SS\_\_0207\_0685348158\_025ERA\_\_0071836SRLC10501\_208\_\_J03.CSV  
SS\_\_0207\_0685348158\_025ERB\_\_0071836SRLC10501\_208\_\_J03.CSV  
ss\_\_0207\_0685348158\_025rls\_\_0071836srlc10501\_208\_\_j03.csv

Survey:

SS\_\_0207\_0685348936\_600EPA\_\_0071836SRLC11421\_108\_\_J09.CSV  
SS\_\_0207\_0685348936\_600ERA\_\_0071836SRLC11421\_108\_\_J09.CSV  
SS\_\_0207\_0685348936\_600ERB\_\_0071836SRLC11421\_108\_\_J09.CSV  
ss\_\_0207\_0685348936\_600rls\_\_0071836srlc11421\_108\_\_j09.csv

Detail 1 (part a):

SS\_\_0208\_0685432333\_690EPA\_\_0071836SRLC11370\_108\_\_J03.CSV

SS\_\_0208\_0685432333\_690ERA\_\_0071836SRLC11370\_108\_\_J03.CSV  
SS\_\_0208\_0685432333\_690ERB\_\_0071836SRLC11370\_108\_\_J03.CSV  
ss\_\_0208\_0685432333\_690rls\_\_0071836srlc11370\_108\_\_j03.csv

Detail 1 (part b):

SS\_\_0208\_0685432982\_755EPA\_\_0071836SRLC11370\_208\_\_J03.CSV  
SS\_\_0208\_0685432982\_755ERA\_\_0071836SRLC11370\_208\_\_J03.CSV  
SS\_\_0208\_0685432982\_755ERB\_\_0071836SRLC11370\_208\_\_J03.CSV  
ss\_\_0208\_0685432982\_755rls\_\_0071836srlc11370\_208\_\_j03.csv

Detail 2 (part a):

SS\_\_0208\_0685433804\_710EPA\_\_0071836SRLC11371\_108\_\_J03.CSV  
SS\_\_0208\_0685433804\_710ERA\_\_0071836SRLC11371\_108\_\_J03.CSV  
SS\_\_0208\_0685433804\_710ERB\_\_0071836SRLC11371\_108\_\_J03.CSV  
ss\_\_0208\_0685433804\_710rls\_\_0071836srlc11371\_108\_\_j03.csv

Detail 2 (part b):

SS\_\_0208\_0685434454\_680EPA\_\_0071836SRLC11371\_208\_\_J03.CSV  
SS\_\_0208\_0685434454\_680ERA\_\_0071836SRLC11371\_208\_\_J03.CSV  
SS\_\_0208\_0685434454\_680ERB\_\_0071836SRLC11371\_208\_\_J03.CSV  
ss\_\_0208\_0685434454\_680rls\_\_0071836srlc11371\_208\_\_j03.csv

Detail 3 (part a):

SS\_\_0208\_0685435280\_635EPA\_\_0071836SRLC11372\_108\_\_J03.CSV  
SS\_\_0208\_0685435280\_635ERA\_\_0071836SRLC11372\_108\_\_J03.CSV  
SS\_\_0208\_0685435280\_635ERB\_\_0071836SRLC11372\_108\_\_J03.CSV  
ss\_\_0208\_0685435280\_635rls\_\_0071836srlc11372\_108\_\_j03.csv

Detail 3 (part b):

SS\_\_0208\_0685435929\_750EPA\_\_0071836SRLC11372\_208\_\_J03.CSV  
SS\_\_0208\_0685435929\_750ERA\_\_0071836SRLC11372\_208\_\_J03.CSV  
SS\_\_0208\_0685435929\_750ERB\_\_0071836SRLC11372\_208\_\_J03.CSV  
ss\_\_0208\_0685435929\_750rls\_\_0071836srlc11372\_208\_\_j03.csv

**Dourbes**

HDR (part a):

SS\_\_0257\_0689783904\_065EPA\_\_0080000SRLC11360\_108\_\_J03.CSV  
SS\_\_0257\_0689783904\_065ERA\_\_0080000SRLC11360\_108\_\_J03.CSV  
SS\_\_0257\_0689783904\_065ERB\_\_0080000SRLC11360\_108\_\_J03.CSV  
ss\_\_0257\_0689783904\_065rls\_\_0080000srlc11360\_108\_\_j03.csv

HDR (part b):

SS\_\_0257\_0689784553\_585EPA\_\_0080000SRLC11360\_208\_\_J03.CSV  
SS\_\_0257\_0689784553\_585ERA\_\_0080000SRLC11360\_208\_\_J03.CSV  
SS\_\_0257\_0689784553\_585ERB\_\_0080000SRLC11360\_208\_\_J03.CSV  
ss\_\_0257\_0689784553\_585rls\_\_0080000srlc11360\_208\_\_j03.csv

Survey 1:

SS\_\_0257\_0689785335\_515EPA\_\_0080000SRLC11421\_108\_\_J06.CSV  
SS\_\_0257\_0689785335\_515ERA\_\_0080000SRLC11421\_108\_\_J06.CSV  
SS\_\_0257\_0689785335\_515ERB\_\_0080000SRLC11421\_108\_\_J06.CSV  
ss\_\_0257\_0689785335\_515rls\_\_0080000srlc11421\_108\_\_j06.csv

Survey 2:

SS\_\_0269\_0690848406\_825EPA\_\_0080000SRLC11421\_108\_\_J06.CSV  
SS\_\_0269\_0690848406\_825ERA\_\_0080000SRLC11421\_108\_\_J06.CSV  
SS\_\_0269\_0690848406\_825ERB\_\_0080000SRLC11421\_108\_\_J06.CSV  
ss\_\_0269\_0690848406\_825rls\_\_0080000srlc11421\_108\_\_j06.csv

Detail 1 (part a):

SS\_\_0269\_0690849690\_630EPA\_\_0080000SRLC11370\_108\_\_J04.CSV  
SS\_\_0269\_0690849690\_630ERA\_\_0080000SRLC11370\_108\_\_J04.CSV  
SS\_\_0269\_0690849690\_630ERB\_\_0080000SRLC11370\_108\_\_J04.CSV  
ss\_\_0269\_0690849690\_630rls\_\_0080000srlc11370\_108\_\_j04.csv

Detail 1 (part b):

SS\_\_0269\_0690850340\_585EPA\_\_0080000SRLC11370\_208\_\_J04.CSV  
SS\_\_0269\_0690850340\_585ERA\_\_0080000SRLC11370\_208\_\_J04.CSV  
SS\_\_0269\_0690850340\_585ERB\_\_0080000SRLC11370\_208\_\_J04.CSV  
ss\_\_0269\_0690850340\_585rls\_\_0080000srlc11370\_208\_\_j04.csv

Detail 2 (part a):

SS\_\_0269\_0690851164\_255EPA\_\_0080000SRLC11373\_108\_\_J04.CSV  
SS\_\_0269\_0690851164\_255ERA\_\_0080000SRLC11373\_108\_\_J04.CSV  
SS\_\_0269\_0690851164\_255ERB\_\_0080000SRLC11373\_108\_\_J04.CSV  
ss\_\_0269\_0690851164\_255rls\_\_0080000srlc11373\_108\_\_j04.csv

Detail 2 (part b):

SS\_\_0269\_0690851813\_405EPA\_\_0080000SRLC11373\_208\_\_J04.CSV  
SS\_\_0269\_0690851813\_405ERA\_\_0080000SRLC11373\_208\_\_J04.CSV  
SS\_\_0269\_0690851813\_405ERB\_\_0080000SRLC11373\_208\_\_J04.CSV  
ss\_\_0269\_0690851813\_405rls\_\_0080000srlc11373\_208\_\_j04.csv

Detail 3 (part a):

SS\_\_0269\_0690852635\_600EPA\_\_0080000SRLC11374\_108\_\_J04.CSV  
SS\_\_0269\_0690852635\_600ERA\_\_0080000SRLC11374\_108\_\_J04.CSV  
SS\_\_0269\_0690852635\_600ERB\_\_0080000SRLC11374\_108\_\_J04.CSV  
ss\_\_0269\_0690852635\_600rls\_\_0080000srlc11374\_108\_\_j04.csv

Detail 3 (part b):

SS\_\_0269\_0690853284\_920EPA\_\_0080000SRLC11374\_208\_\_J03.CSV  
SS\_\_0269\_0690853284\_920ERA\_\_0080000SRLC11374\_208\_\_J03.CSV  
SS\_\_0269\_0690853284\_920ERB\_\_0080000SRLC11374\_208\_\_J03.CSV  
ss\_\_0269\_0690853284\_920rls\_\_0080000srlc11374\_208\_\_j03.csv

**Quartier**



HDR (part a):

SS\_\_0293\_0692979640\_115EPA\_\_0090000SRLC11360\_108\_\_J03.CSV  
SS\_\_0293\_0692979640\_115ERA\_\_0090000SRLC11360\_108\_\_J03.CSV  
SS\_\_0293\_0692979640\_115ERB\_\_0090000SRLC11360\_108\_\_J03.CSV  
ss\_\_0293\_0692979640\_115rls\_\_0090000srhc11360\_108\_\_j03.csv

HDR (part b):

SS\_\_0293\_0692980289\_265EPA\_\_0090000SRLC11360\_208\_\_J03.CSV  
SS\_\_0293\_0692980289\_265ERA\_\_0090000SRLC11360\_208\_\_J03.CSV  
SS\_\_0293\_0692980289\_265ERB\_\_0090000SRLC11360\_208\_\_J03.CSV  
ss\_\_0293\_0692980289\_265rls\_\_0090000srhc11360\_208\_\_j03.csv

Survey 1:

SS\_\_0293\_0692981070\_175EPA\_\_0090000SRLC11420\_108\_\_J06.CSV  
SS\_\_0293\_0692981070\_175ERA\_\_0090000SRLC11420\_108\_\_J06.CSV  
SS\_\_0293\_0692981070\_175ERB\_\_0090000SRLC11420\_108\_\_J06.CSV  
ss\_\_0293\_0692981070\_175rls\_\_0090000srhc11420\_108\_\_j06.csv

Survey 2:

SS\_\_0304\_0693959951\_875EPA\_\_0090000SRLC11451\_108\_\_J05.CSV  
SS\_\_0304\_0693959951\_875ERA\_\_0090000SRLC11451\_108\_\_J05.CSV  
SS\_\_0304\_0693959951\_875ERB\_\_0090000SRLC11451\_108\_\_J05.CSV  
ss\_\_0304\_0693959951\_875rls\_\_0090000srhc11451\_108\_\_j05.csv

Detail 1 (part a):

SS\_\_0304\_0693961008\_675EPA\_\_0090000SRLC11372\_108\_\_J02.CSV  
SS\_\_0304\_0693961008\_675ERA\_\_0090000SRLC11372\_108\_\_J02.CSV  
SS\_\_0304\_0693961008\_675ERB\_\_0090000SRLC11372\_108\_\_J02.CSV  
ss\_\_0304\_0693961008\_675rls\_\_0090000srhc11372\_108\_\_j02.csv

Detail 1 (part b):

SS\_\_0304\_0693961658\_010EPA\_\_0090000SRLC11372\_208\_\_J02.CSV  
SS\_\_0304\_0693961658\_010ERA\_\_0090000SRLC11372\_208\_\_J02.CSV  
SS\_\_0304\_0693961658\_010ERB\_\_0090000SRLC11372\_208\_\_J02.CSV  
ss\_\_0304\_0693961658\_010rls\_\_0090000srhc11372\_208\_\_j02.csv

Detail 2 (part a):

SS\_\_0304\_0693962475\_780EPA\_\_0090000SRLC11373\_108\_\_J02.CSV  
SS\_\_0304\_0693962475\_780ERA\_\_0090000SRLC11373\_108\_\_J02.CSV  
SS\_\_0304\_0693962475\_780ERB\_\_0090000SRLC11373\_108\_\_J02.CSV  
ss\_\_0304\_0693962475\_780rls\_\_0090000srhc11373\_108\_\_j02.csv

Detail 2 (part b):

SS\_\_0304\_0693963125\_235EPA\_\_0090000SRLC11373\_208\_\_J02.CSV  
SS\_\_0304\_0693963125\_235ERA\_\_0090000SRLC11373\_208\_\_J02.CSV  
SS\_\_0304\_0693963125\_235ERB\_\_0090000SRLC11373\_208\_\_J02.CSV  
ss\_\_0304\_0693963125\_235rls\_\_0090000srhc11373\_208\_\_j02.csv

Detail 3 (part a):

SS\_\_0304\_0693963943\_980EPA\_\_0090000SRLC11374\_108\_\_J02.CSV  
SS\_\_0304\_0693963943\_980ERA\_\_0090000SRLC11374\_108\_\_J02.CSV  
SS\_\_0304\_0693963943\_980ERB\_\_0090000SRLC11374\_108\_\_J02.CSV  
ss\_\_0304\_0693963943\_980rls\_\_0090000srlc11374\_108\_\_j02.csv

Detail 3 (part b):

SS\_\_0304\_0693964592\_870EPA\_\_0090000SRLC11374\_208\_\_J02.CSV  
SS\_\_0304\_0693964592\_870ERA\_\_0090000SRLC11374\_208\_\_J02.CSV  
SS\_\_0304\_0693964592\_870ERB\_\_0090000SRLC11374\_208\_\_J02.CSV  
ss\_\_0304\_0693964592\_870rls\_\_0090000srlc11374\_208\_\_j02.csv

Detail 4 (part a):

SS\_\_0304\_0693965408\_820EPA\_\_0090000SRLC11375\_108\_\_J02.CSV  
SS\_\_0304\_0693965408\_820ERA\_\_0090000SRLC11375\_108\_\_J02.CSV  
SS\_\_0304\_0693965408\_820ERB\_\_0090000SRLC11375\_108\_\_J02.CSV  
ss\_\_0304\_0693965408\_820rls\_\_0090000srlc11375\_108\_\_j02.csv

Detail 4 (part b):

SS\_\_0304\_0693966058\_170EPA\_\_0090000SRLC11375\_208\_\_J02.CSV  
SS\_\_0304\_0693966058\_170ERA\_\_0090000SRLC11375\_208\_\_J02.CSV  
SS\_\_0304\_0693966058\_170ERB\_\_0090000SRLC11375\_208\_\_J02.CSV  
ss\_\_0304\_0693966058\_170rls\_\_0090000srlc11375\_208\_\_j02.csv

**Thornton Gap**

HDR 1 (part a):

SS\_\_0489\_0710377627\_500EPA\_\_0261004SRLC11360\_108\_\_J02.CSV  
SS\_\_0489\_0710377627\_500ERA\_\_0261004SRLC11360\_108\_\_J02.CSV  
SS\_\_0489\_0710377627\_500ERB\_\_0261004SRLC11360\_108\_\_J02.CSV  
ss\_\_0489\_0710377627\_500rls\_\_0261004srlc11360\_108\_\_j02.csv

HDR 1 (part b):

SS\_\_0489\_0710378276\_295EPA\_\_0261004SRLC11360\_208\_\_J02.CSV  
SS\_\_0489\_0710378276\_295ERA\_\_0261004SRLC11360\_208\_\_J02.CSV  
SS\_\_0489\_0710378276\_295ERB\_\_0261004SRLC11360\_208\_\_J02.CSV  
ss\_\_0489\_0710378276\_295rls\_\_0261004srlc11360\_208\_\_j02.csv

Detail 1 (part a):

SS\_\_0489\_0710379058\_350EPA\_\_0261004SRLC11370\_108\_\_J02.CSV  
SS\_\_0489\_0710379058\_350ERA\_\_0261004SRLC11370\_108\_\_J02.CSV  
SS\_\_0489\_0710379058\_350ERB\_\_0261004SRLC11370\_108\_\_J02.CSV  
ss\_\_0489\_0710379058\_350rls\_\_0261004srlc11370\_108\_\_j02.csv

Detail 1 (part b):

SS\_\_0489\_0710379707\_400EPA\_\_0261004SRLC11370\_208\_\_J02.CSV  
SS\_\_0489\_0710379707\_400ERA\_\_0261004SRLC11370\_208\_\_J02.CSV  
SS\_\_0489\_0710379707\_400ERB\_\_0261004SRLC11370\_208\_\_J02.CSV

ss\_\_0489\_0710379707\_400rls\_\_0261004srhc11370\_208\_\_j03.csv

Survey 1:

SS\_\_0489\_0710380488\_510EPA\_\_0261004SRLC11420\_108\_\_J03.CSV

SS\_\_0489\_0710380488\_510ERA\_\_0261004SRLC11420\_108\_\_J03.CSV

SS\_\_0489\_0710380488\_510ERB\_\_0261004SRLC11420\_108\_\_J03.CSV

ss\_\_0489\_0710380488\_510rls\_\_0261004srhc11420\_108\_\_j03.csv

HDR 2 (part a):

SS\_\_0489\_0710382169\_545EPA\_\_0261004SRLC11360\_108\_\_J02.CSV

SS\_\_0489\_0710382169\_545ERA\_\_0261004SRLC11360\_108\_\_J02.CSV

SS\_\_0489\_0710382169\_545ERB\_\_0261004SRLC11360\_108\_\_J02.CSV

ss\_\_0489\_0710382169\_545rls\_\_0261004srhc11360\_108\_\_j02.csv

HDR 2 (part b):

SS\_\_0489\_0710382818\_445EPA\_\_0261004SRLC11360\_208\_\_J02.CSV

SS\_\_0489\_0710382818\_445ERA\_\_0261004SRLC11360\_208\_\_J02.CSV

SS\_\_0489\_0710382818\_445ERB\_\_0261004SRLC11360\_208\_\_J02.CSV

ss\_\_0489\_0710382818\_445rls\_\_0261004srhc11360\_208\_\_j02.csv

Detail 2 (part a):

SS\_\_0489\_0710383600\_515EPA\_\_0261004SRLC11370\_108\_\_J02.CSV

SS\_\_0489\_0710383600\_515ERA\_\_0261004SRLC11370\_108\_\_J02.CSV

SS\_\_0489\_0710383600\_515ERB\_\_0261004SRLC11370\_108\_\_J02.CSV

ss\_\_0489\_0710383600\_515rls\_\_0261004srhc11370\_108\_\_j03.csv

Detail 2 (part b):

SS\_\_0489\_0710384249\_650EPA\_\_0261004SRLC11370\_208\_\_J02.CSV

SS\_\_0489\_0710384249\_650ERA\_\_0261004SRLC11370\_208\_\_J02.CSV

SS\_\_0489\_0710384249\_650ERB\_\_0261004SRLC11370\_208\_\_J02.CSV

ss\_\_0489\_0710384249\_650rls\_\_0261004srhc11370\_208\_\_j02.csv

Survey 2:

SS\_\_0489\_0710385032\_565EPA\_\_0261004SRLC11420\_108\_\_J03.CSV

SS\_\_0489\_0710385032\_565ERA\_\_0261004SRLC11420\_108\_\_J03.CSV

SS\_\_0489\_0710385032\_565ERB\_\_0261004SRLC11420\_108\_\_J03.CSV

ss\_\_0489\_0710385032\_565rls\_\_0261004srhc11420\_108\_\_j03.csv

**Berry Hollow**

HDR (part a):

SS\_\_0505\_0711795172\_280EPA\_\_0261222SRLC11360\_108\_\_J02.CSV

SS\_\_0505\_0711795172\_280ERA\_\_0261222SRLC11360\_108\_\_J02.CSV

SS\_\_0505\_0711795172\_280ERB\_\_0261222SRLC11360\_108\_\_J02.CSV

ss\_\_0505\_0711795172\_280rls\_\_0261222srhc11360\_108\_\_j02.csv

HDR (part b):

SS\_\_0505\_0711795820\_880EPA\_\_0261222SRLC11360\_208\_\_J02.CSV

SS\_\_0505\_0711795820\_880ERA\_\_0261222SRLC11360\_208\_\_J02.CSV

SS\_\_0505\_0711795820\_880ERB\_\_0261222SRLC11360\_208\_\_J02.CSV  
ss\_\_0505\_0711795820\_880rls\_\_0261222srlc11360\_208\_\_j02.csv

Detail 1 (part a):

SS\_\_0505\_0711796602\_020EPA\_\_0261222SRLC11370\_108\_\_J02.CSV  
SS\_\_0505\_0711796602\_020ERA\_\_0261222SRLC11370\_108\_\_J02.CSV  
SS\_\_0505\_0711796602\_020ERB\_\_0261222SRLC11370\_108\_\_J02.CSV  
ss\_\_0505\_0711796602\_020rls\_\_0261222srlc11370\_108\_\_j02.csv

Detail 1 (part b):

SS\_\_0505\_0711797251\_025EPA\_\_0261222SRLC11370\_208\_\_J02.CSV  
SS\_\_0505\_0711797251\_025ERA\_\_0261222SRLC11370\_208\_\_J02.CSV  
SS\_\_0505\_0711797251\_025ERB\_\_0261222SRLC11370\_208\_\_J02.CSV  
ss\_\_0505\_0711797251\_025rls\_\_0261222srlc11370\_208\_\_j02.csv

Survey:

SS\_\_0513\_0712513080\_580EPA\_\_0261222SRLC11440\_108\_\_J02.CSV  
SS\_\_0513\_0712513080\_580ERA\_\_0261222SRLC11440\_108\_\_J02.CSV  
SS\_\_0513\_0712513080\_580ERB\_\_0261222SRLC11440\_108\_\_J02.CSV  
ss\_\_0513\_0712513080\_580rls\_\_0261222srlc11440\_108\_\_j02.csv

Detail 1 (part a):

SS\_\_0513\_0712514114\_395EPA\_\_0261222SRLC11372\_108\_\_J02.CSV  
SS\_\_0513\_0712514114\_395ERA\_\_0261222SRLC11372\_108\_\_J02.CSV  
SS\_\_0513\_0712514114\_395ERB\_\_0261222SRLC11372\_108\_\_J02.CSV  
ss\_\_0513\_0712514114\_395rls\_\_0261222srlc11372\_108\_\_j02.csv

Detail 1 (part b):

SS\_\_0513\_0712514763\_385EPA\_\_0261222SRLC11372\_208\_\_J02.CSV  
SS\_\_0513\_0712514763\_385ERA\_\_0261222SRLC11372\_208\_\_J02.CSV  
SS\_\_0513\_0712514763\_385ERB\_\_0261222SRLC11372\_208\_\_J02.CSV  
ss\_\_0513\_0712514763\_385rls\_\_0261222srlc11372\_208\_\_j02.csv

Detail 2 (part a):

SS\_\_0513\_0712515579\_390EPA\_\_0261222SRLC11373\_108\_\_J02.CSV  
SS\_\_0513\_0712515579\_390ERA\_\_0261222SRLC11373\_108\_\_J02.CSV  
SS\_\_0513\_0712515579\_390ERB\_\_0261222SRLC11373\_108\_\_J02.CSV  
ss\_\_0513\_0712515579\_390rls\_\_0261222srlc11373\_108\_\_j02.csv

Detail 2 (part b):

SS\_\_0513\_0712516228\_405EPA\_\_0261222SRLC11373\_208\_\_J02.CSV  
SS\_\_0513\_0712516228\_405ERA\_\_0261222SRLC11373\_208\_\_J02.CSV  
SS\_\_0513\_0712516228\_405ERB\_\_0261222SRLC11373\_208\_\_J02.CSV  
ss\_\_0513\_0712516228\_405rls\_\_0261222srlc11373\_208\_\_j02.csv

Detail 3 (part a):

SS\_\_0513\_0712517045\_550EPA\_\_0261222SRLC11374\_108\_\_J02.CSV  
SS\_\_0513\_0712517045\_550ERA\_\_0261222SRLC11374\_108\_\_J02.CSV

SS\_\_0513\_0712517045\_550ERB\_\_0261222SRLC11374\_108\_\_J02.CSV  
ss\_\_0513\_0712517045\_550rls\_\_0261222srlc11374\_108\_\_j02.csv

Detail 3 (part b):

SS\_\_0513\_0712517694\_430EPA\_\_0261222SRLC11374\_208\_\_J02.CSV  
SS\_\_0513\_0712517694\_430ERA\_\_0261222SRLC11374\_208\_\_J02.CSV  
SS\_\_0513\_0712517694\_430ERB\_\_0261222SRLC11374\_208\_\_J02.CSV  
ss\_\_0513\_0712517694\_430rls\_\_0261222srlc11374\_208\_\_j02.csv

Detail 4 (part a):

SS\_\_0513\_0712518509\_495EPA\_\_0261222SRLC11375\_108\_\_J02.CSV  
SS\_\_0513\_0712518509\_495ERA\_\_0261222SRLC11375\_108\_\_J02.CSV  
SS\_\_0513\_0712518509\_495ERB\_\_0261222SRLC11375\_108\_\_J02.CSV  
ss\_\_0513\_0712518509\_495rls\_\_0261222srlc11375\_108\_\_j02.csv

Detail 4 (part b):

SS\_\_0513\_0712519158\_660EPA\_\_0261222SRLC11375\_208\_\_J02.CSV  
SS\_\_0513\_0712519158\_660ERA\_\_0261222SRLC11375\_208\_\_J02.CSV  
SS\_\_0513\_0712519158\_660ERB\_\_0261222SRLC11375\_208\_\_J02.CSV  
ss\_\_0513\_0712519158\_660rls\_\_0261222srlc11375\_208\_\_j02.csv

**Table S1.** Bulk composition of rock targets from PIXL compared to number (n) of luminescence features found in SHERLOC survey and HDR scans (see section 2 for definitions). We track the bulk P<sub>2</sub>O<sub>5</sub> wt% as relevant proxies for phosphate contents. We track SiO<sub>2</sub> wt% as a proxy for more high-Si phases that may contain silica or silicate defects. We track K<sub>2</sub>O wt% as a proxy for more felsic compositions. We can track FeO<sub>T</sub> wt% as a proxy for phases that would be strongly UV absorbing and therefore lead to false non-detections.

| Target            | Lithology                  | SiO <sub>2</sub><br>(wt%) | FeO <sub>T</sub><br>(wt%) | P <sub>2</sub> O <sub>5</sub><br>(wt%) | K <sub>2</sub> O<br>(wt%) | n <sub>330-350</sub><br><i>survey</i> | n <sub>330-350</sub><br><i>HDR</i> | n <sub>330-350</sub><br><i>detail</i> | n <sub>270-290</sub><br><i>survey</i> | n <sub>270-290</sub><br><i>HDR</i> | n <sub>270-290</sub><br><i>detail</i> |
|-------------------|----------------------------|---------------------------|---------------------------|----------------------------------------|---------------------------|---------------------------------------|------------------------------------|---------------------------------------|---------------------------------------|------------------------------------|---------------------------------------|
| Bellegarde        | Basalt                     | 43.8±2.2                  | 23.3±1.2                  | 2.8±0.6                                | 1.1±0.3                   | 227                                   | 57                                 | N/A                                   | 55                                    | 25                                 | N/A                                   |
| Alfalfa           | Basalt                     | 56.1±2.8                  | 11.1±0.6                  | 1.0±0.3                                | 1.9±0.5                   | 111                                   | 78                                 | N/A                                   | 90                                    | 58                                 | N/A                                   |
| Montpezat         | Basalt                     | 44.8±2.2                  | 18.3±0.9                  | 1.2±0.4                                | 0.8±0.3                   | 55                                    | 51                                 | N/A                                   | 9                                     | 12                                 | N/A                                   |
| Dourbes<br>scan 1 | Olivine<br>cumulate        | 39.4±2.0                  | 29.3±1.6                  | 0.3±0.2                                | 0.1±0.1                   | 23                                    | 8                                  | N/A                                   | 0                                     | 4                                  | N/A                                   |
| Dourbes<br>scan 2 | Olivine<br>cumulate        | 37.2±1.9                  | 29.3±1.5                  | 0.8±0.3                                | 0.3±0.2                   | 47                                    | N/A                                | 48                                    | 1                                     | N/A                                | 3                                     |
| Quartier          | Olivine<br>cumulate        | 33.3±1.7                  | 29.4±1.5                  | 0.4±0.2                                | 0.1±0.1                   | 22                                    | 2                                  | 13                                    | 0                                     | 0                                  | 2                                     |
| Thornton<br>Gap   | Lower<br>Delta<br>Sediment | 22.8±1.1                  | 23.8±1.2                  | 0.3±0.2                                | 0.3±0.2                   | 4                                     | 2                                  | 13                                    | 0                                     | 4                                  | 0                                     |
| Berry<br>Hollow   | Lower<br>Delta<br>Sediment | 32.2±1.6                  | 17.6±0.9                  | 0.8±0.3                                | 0.2±0.2                   | 1                                     | 1                                  | N/A                                   | 0                                     | 0                                  | 0                                     |

*N/A means that an HDR or detail dataset was not obtained for that scan.*

**Fig. S1.** Example of gentle positive slope luminescence expected from macromolecular carbon co-occurring with Raman G-band in the meteorite caltarget, SaU008, measured on SHERLOC. These organic compounds occur in calcite crystals, suggesting that they arise from terrestrial contamination.

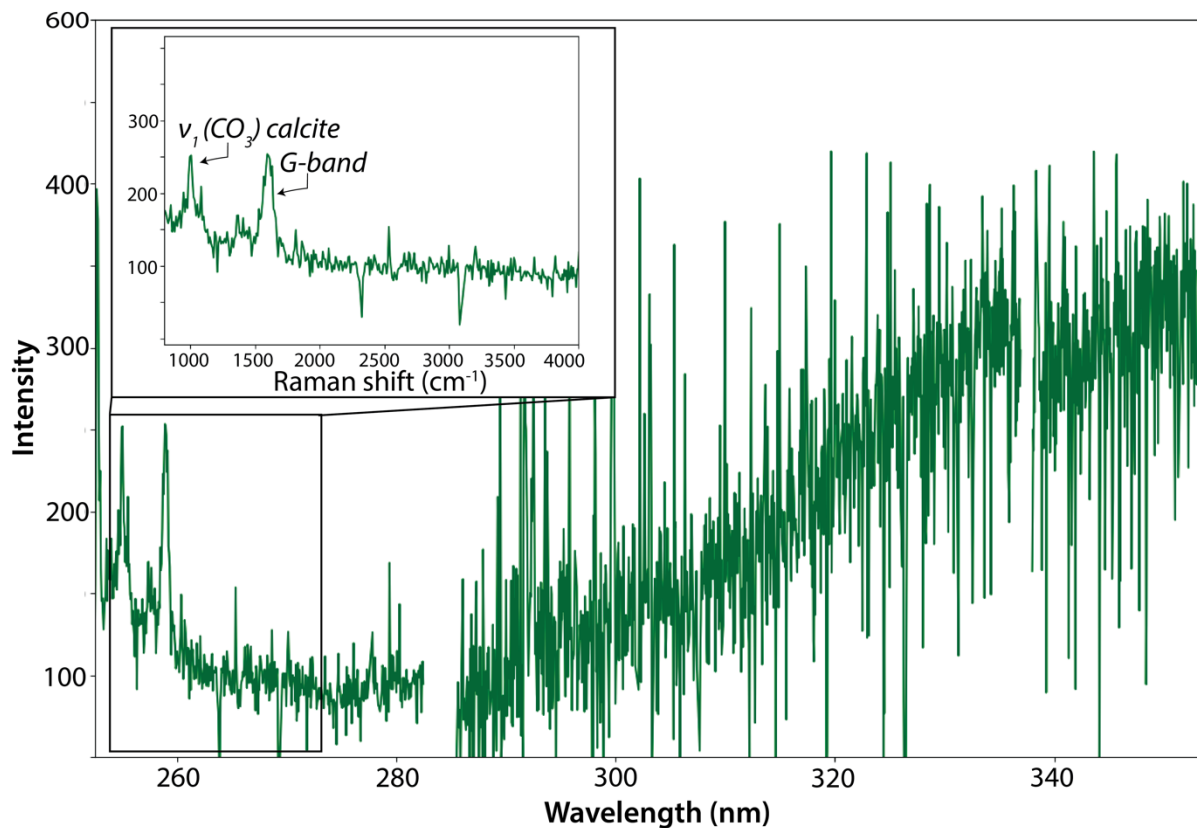

**Fig. S2.** Raman and luminescence spectra of phosphate grains compared with Raman and luminescence spectra of matrix (wherein sub-micron  $\mu\text{m}$  phosphate grains are common), feldspar grains, and pyroxene grains within NWA 10922. Spot numbers refer to locations in the XRF image from Fig. 4A.

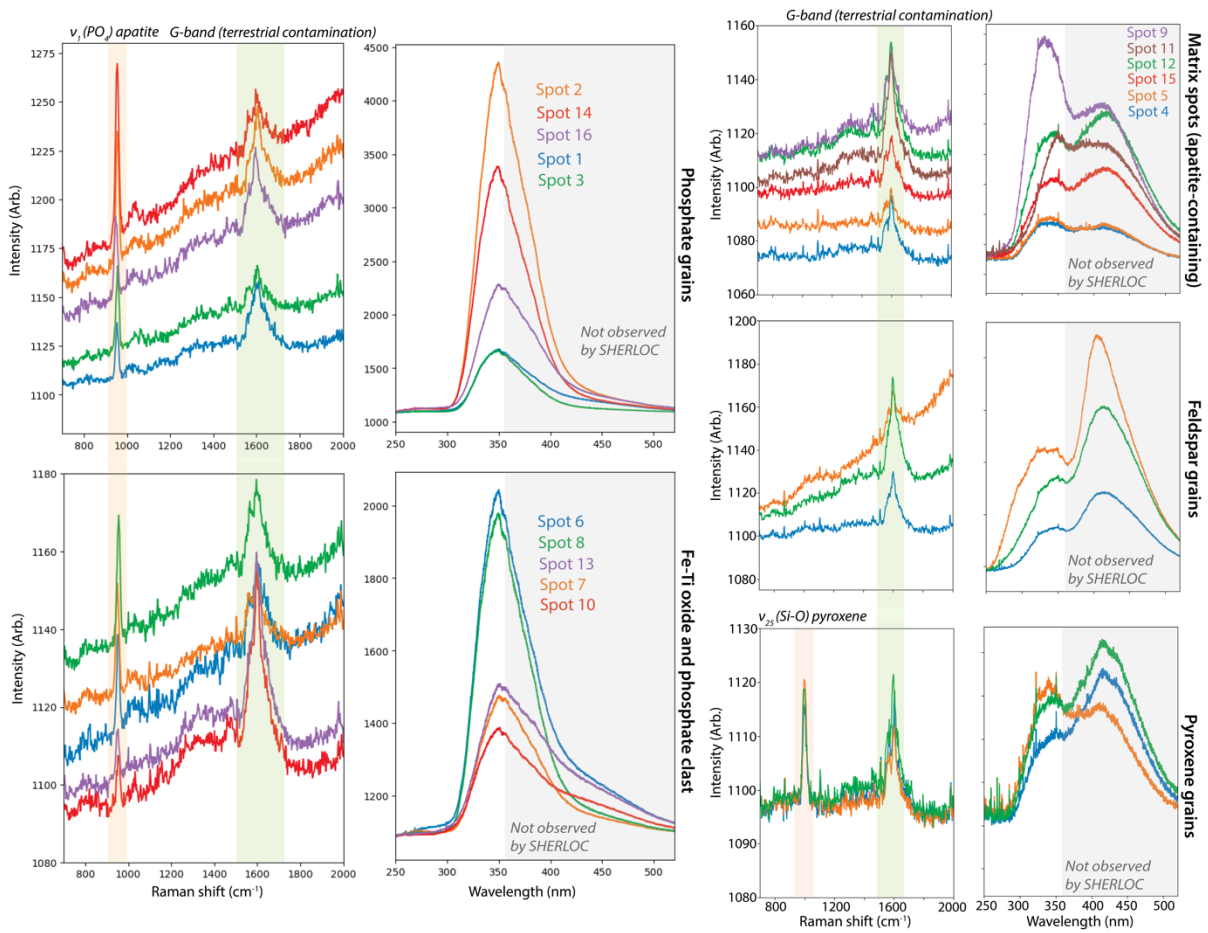



**Fig. S3.** Example of Gaussian modeling utilized for three meteorite measurements shown in Fig. S2 and Fig. 4. Spot 2 and spot 14 are from phosphate grains and exhibit a high intensity 330-350 nm signal matching the expected  $\text{Ce}^{3+}$  transitions. Spot 9 is from the matrix region. We note that a doublet is present at 330-350 nm but the spectral positions and intensity ratios change. Note much lower intensity signal in spot 9 in comparison to the phosphate grains. This allows the  $\sim 430$  nm band to be observed directly in the data. We prefer assignment of  $\sim 430$  nm band to macromolecular carbon terrestrial contamination that is omnipresent in the meteorite. This figure exemplifies gaussian mixture modeling methodology used for all experiment and SHERLOC flight data for investigation of spectral positions and shapes.

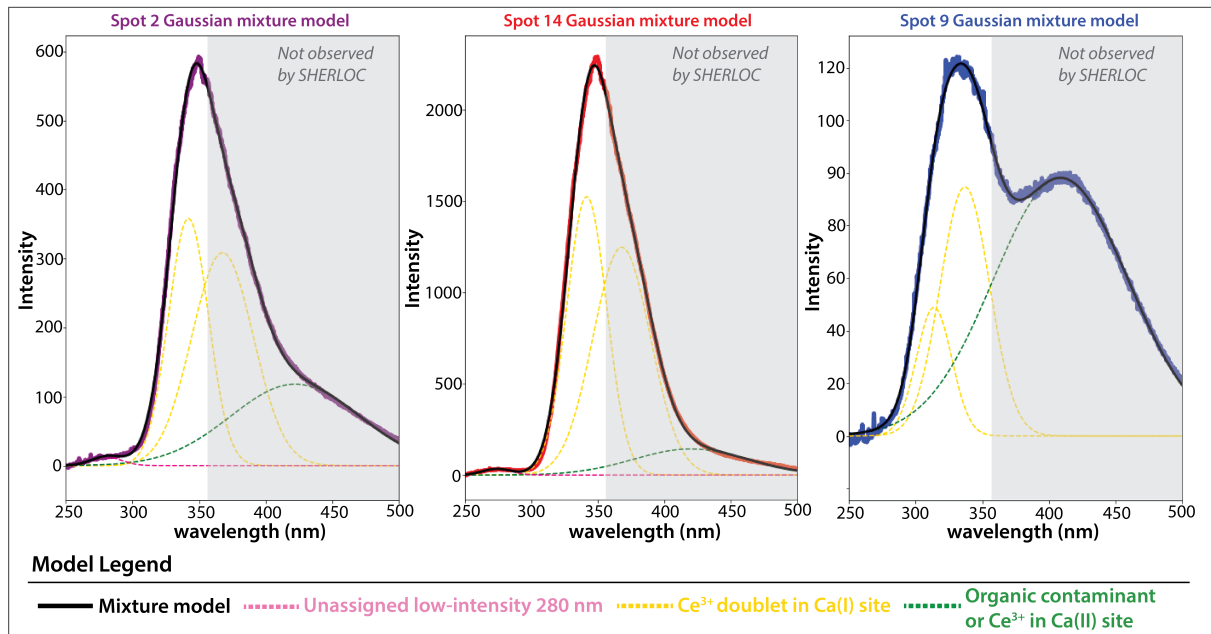

**Fig. S4.** Histogram of peak positions of analyzed 950-970  $\text{cm}^{-1}$  Raman peaks from SHERLOC data across all scans. All peak positions have on average  $\pm 5 \text{ cm}^{-1}$  uncertainty. Grey bars show the spread in SHERLOC Raman peak positions across scans. Orange and red bars show the spread in Raman peak positions of chlorapatites and hydroxy/fluorapatite, respectively, measured on the ACRONM laboratory instrument.

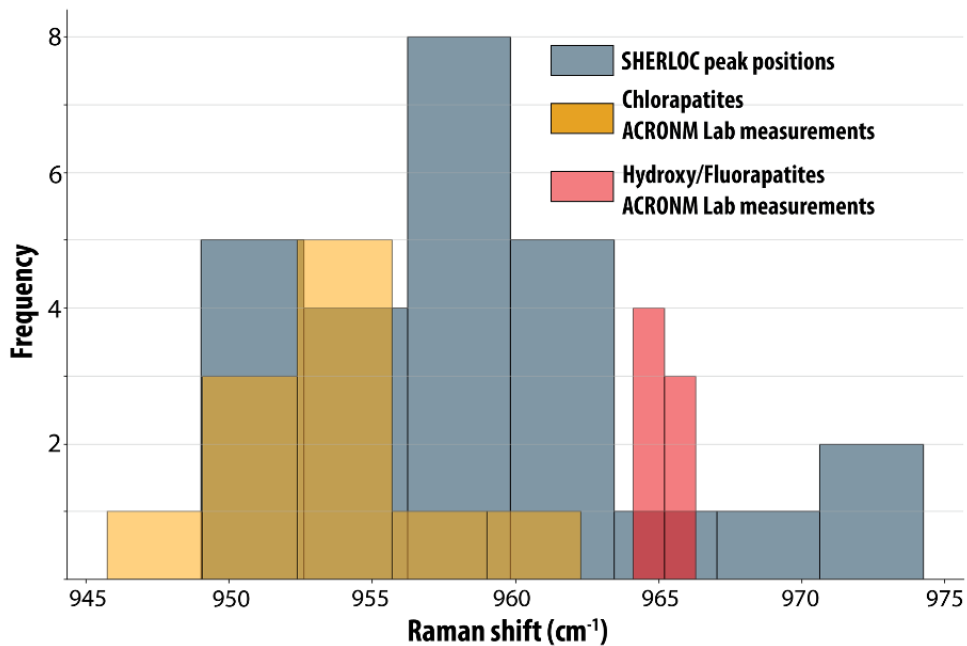

**Fig. S5:** Left panels show luminescence identifications (stars) superposed on Raman peak identifications (circles) in analyzed HDR scans from rock targets in the Máaz fm. Open white circles indicate no detections. Right panels show 330-350 nm luminescence (and coinciding 270-290 nm luminescence) superposed on co-registered P<sub>2</sub>O<sub>5</sub> PIXL maps; only features that coincide with the PIXL map are displayed. As the co-registration between maps have inherent uncertainty and the spacing of SHERLOC HDR grid points are so far apart compared to the spacing of PIXL spots, the datasets cannot be quantitatively compared. However, we note that the HDR grid scans are just a down-sampled version of survey scans shown in Fig. 5 as they cover the same area in the rock. Spectra in these HDR scans that do not obviously correlate with phosphate or P<sub>2</sub>O<sub>5</sub> were explored in Fig. S11.

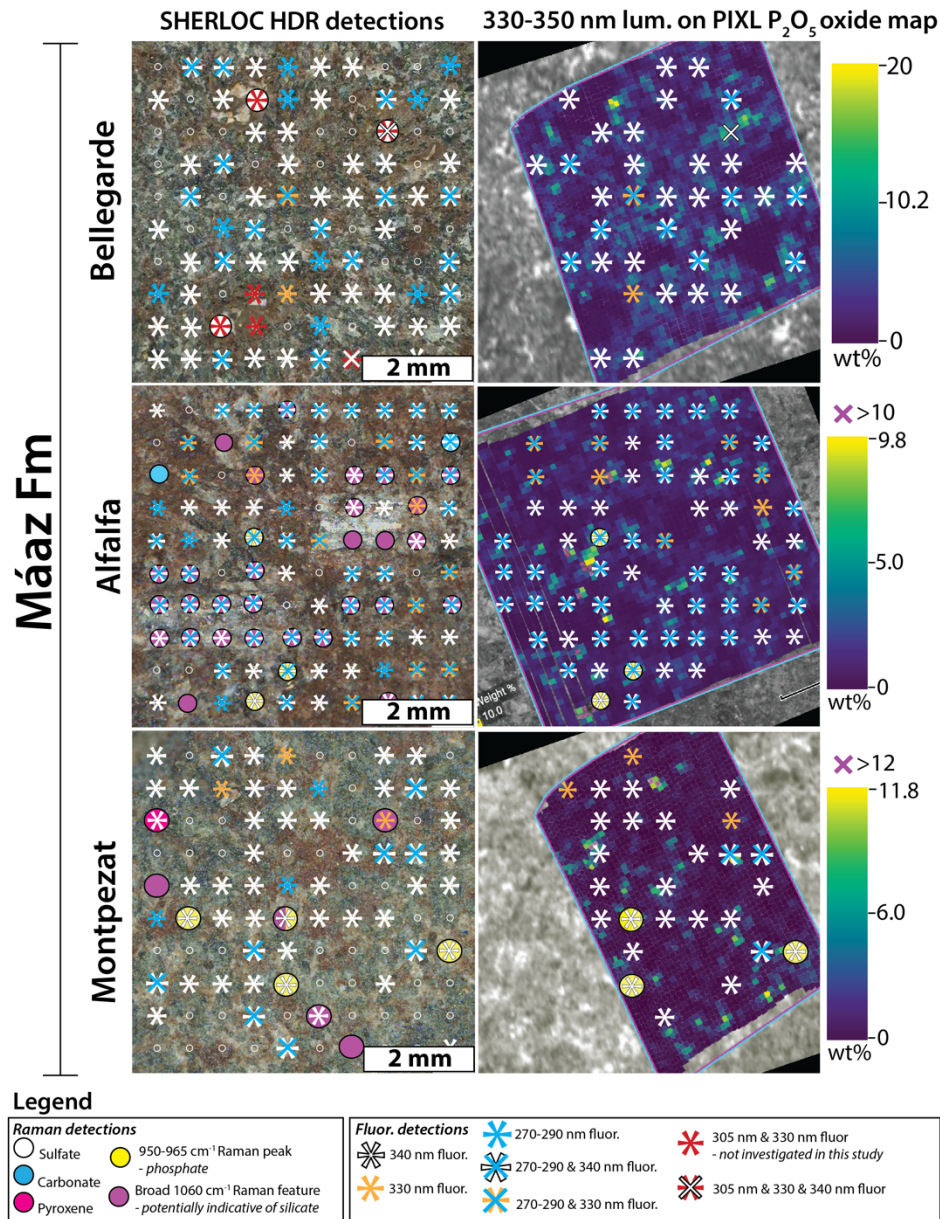

**Fig. S6:** Left panels show luminescence identifications (stars) superposed on Raman peak identifications (circles) in analyzed HDR scans from rock targets in the Mááz fm. Open white circles indicate no detections. Right panels show 270-290 nm luminescence (and coinciding 330-350 nm luminescence) superposed on co-registered PIXL SiO<sub>2</sub>, Al<sub>2</sub>O<sub>3</sub>, and FeO<sub>T</sub> composite maps; only features that coincide with the PIXL map are displayed. Correlations are not easily explored with the HDR scans where the grid spacing is on a different scale compared to PIXL maps, however, HDR detections of 270-290 nm luminescence are found with high-Si phases as well as a variety of silicate compositions not explored at depth in this study.

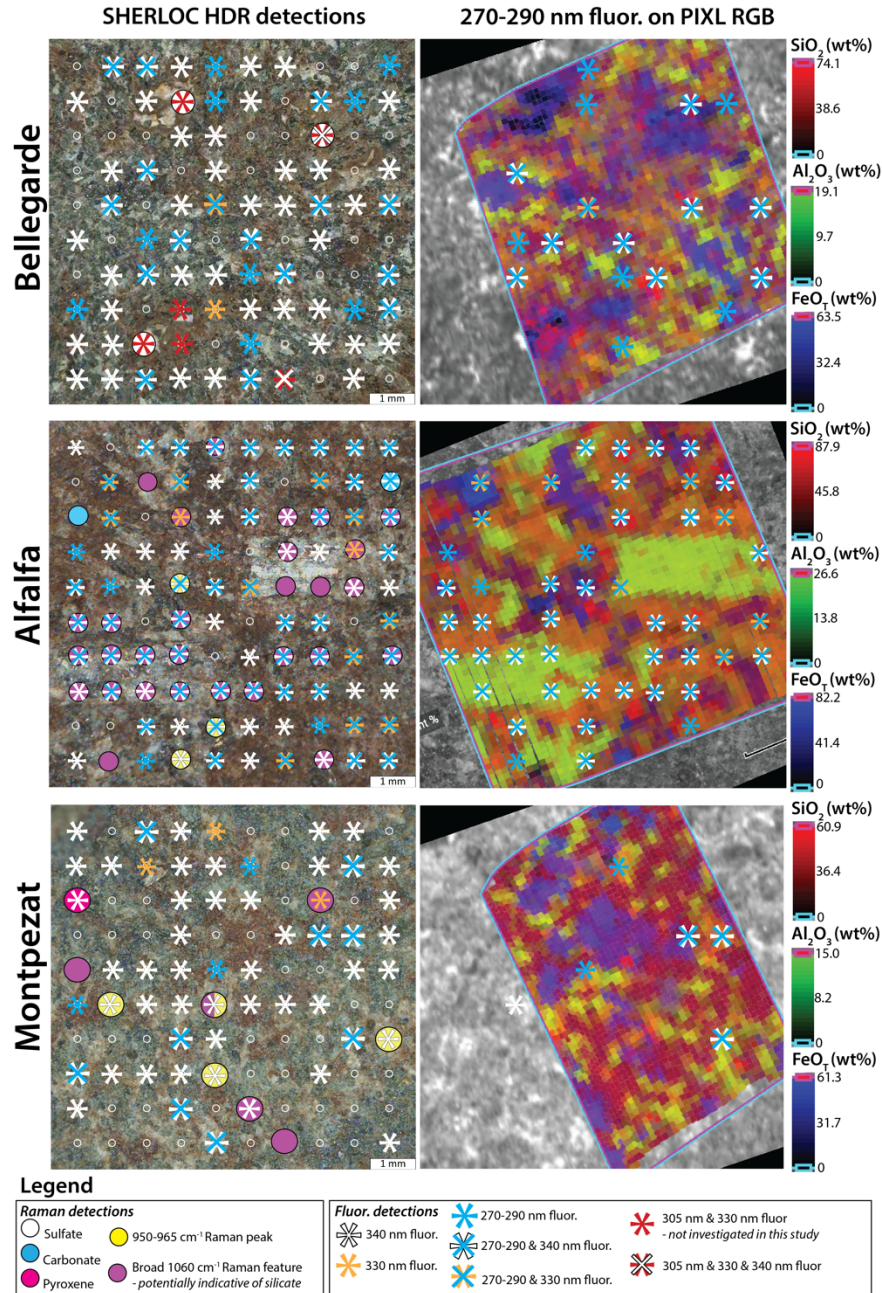

**Fig. S7.** Data from detail scans of the Dourbes scan 2 abraded rock in the Séítah fm. Top panel shows Raman and luminescence detections are symbolized with colored circles and stars respectively on colorized ACI-WATSON image merge. Open white circles indicate that no Raman features were detected. Middle panel shows the 330-350 nm luminescence detection locations on co-registered PIXL  $P_2O_5$  wt% map. Lowermost panel shows luminescence heatmap processed through the same methodology as Fig. 5-6. High intensity luminescence occurs with the highest  $P_2O_5$  wt%. Note the spatial association between  $P_2O_5$  and both 340-350 nm and 330 nm luminescence, despite a lack of phosphate Raman peak identifications. Spectra in these detail scans that do not obviously correlate with phosphate or  $P_2O_5$  were explored in Fig. S11.

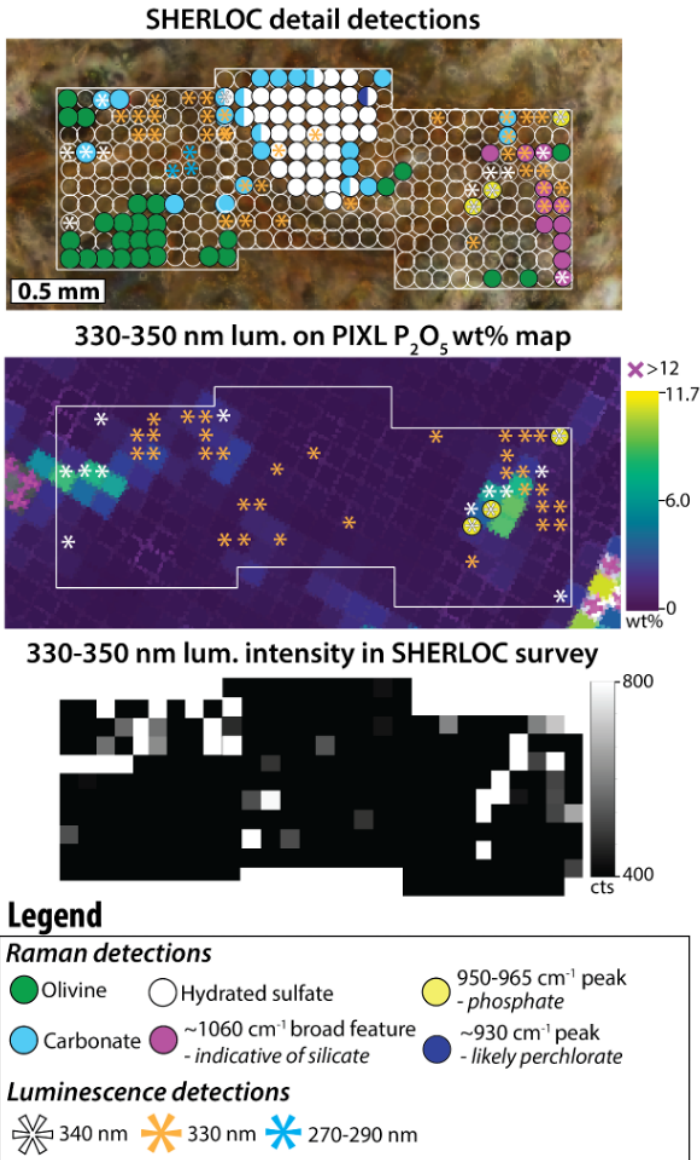

**Fig. S8:** Data from detail scans of the Garde abraded rock in the Séítah fm. Here, no PIXL data was obtained for this abraded rock. Left panels show colorized ACI-WATSON image merges. Middle panels show Raman and luminescence detections symbolized with colored circles and stars. Right panels show greyscale heatmaps of 330-350 nm luminescence and 270-290 nm luminescence with same processed through the same methodology as Figs. 5-6. Note that the correlation between 330-350 nm luminescence, 270-290 nm luminescence, and Raman identifications of phosphate are unusually strong in this scan.

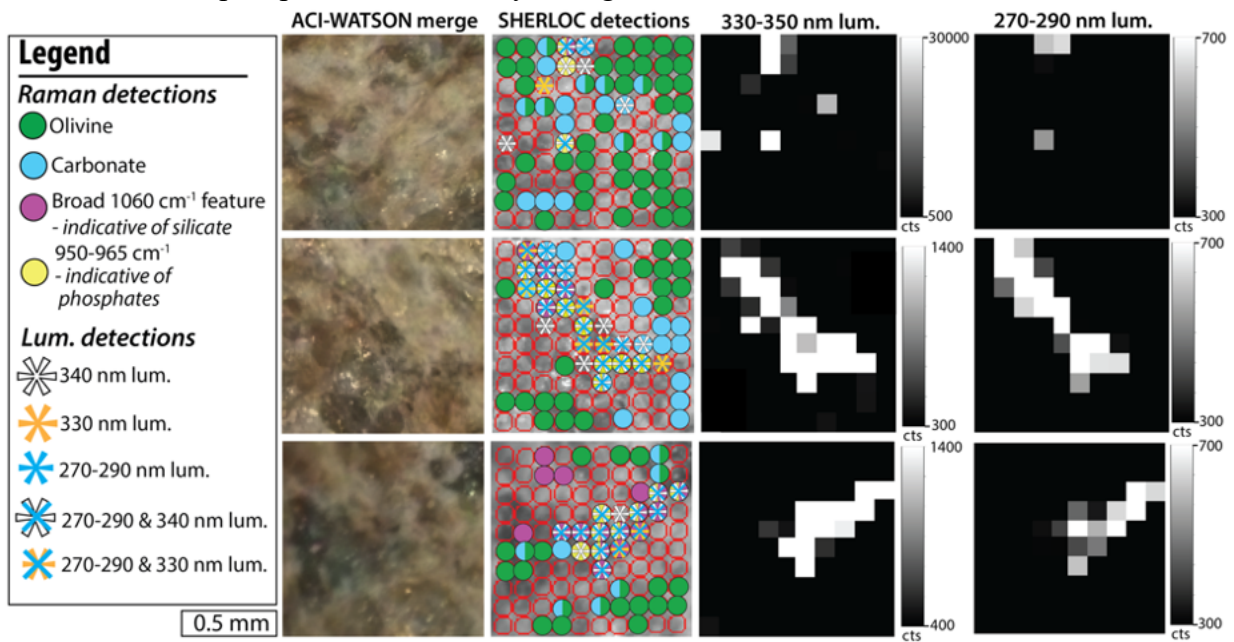

**Fig. S9:** Processing methodology to co-register and examine cross-correlation of PIXL elemental maps with SHERLOC luminescence maps. The ENVI software correlation method is used for all results and figures. However, the correlation statistics methodology is only used for comparisons between SHERLOC survey luminescence maps and PIXL elemental maps where the grid spacing and amount of data points are sufficient for quantitative correlations.

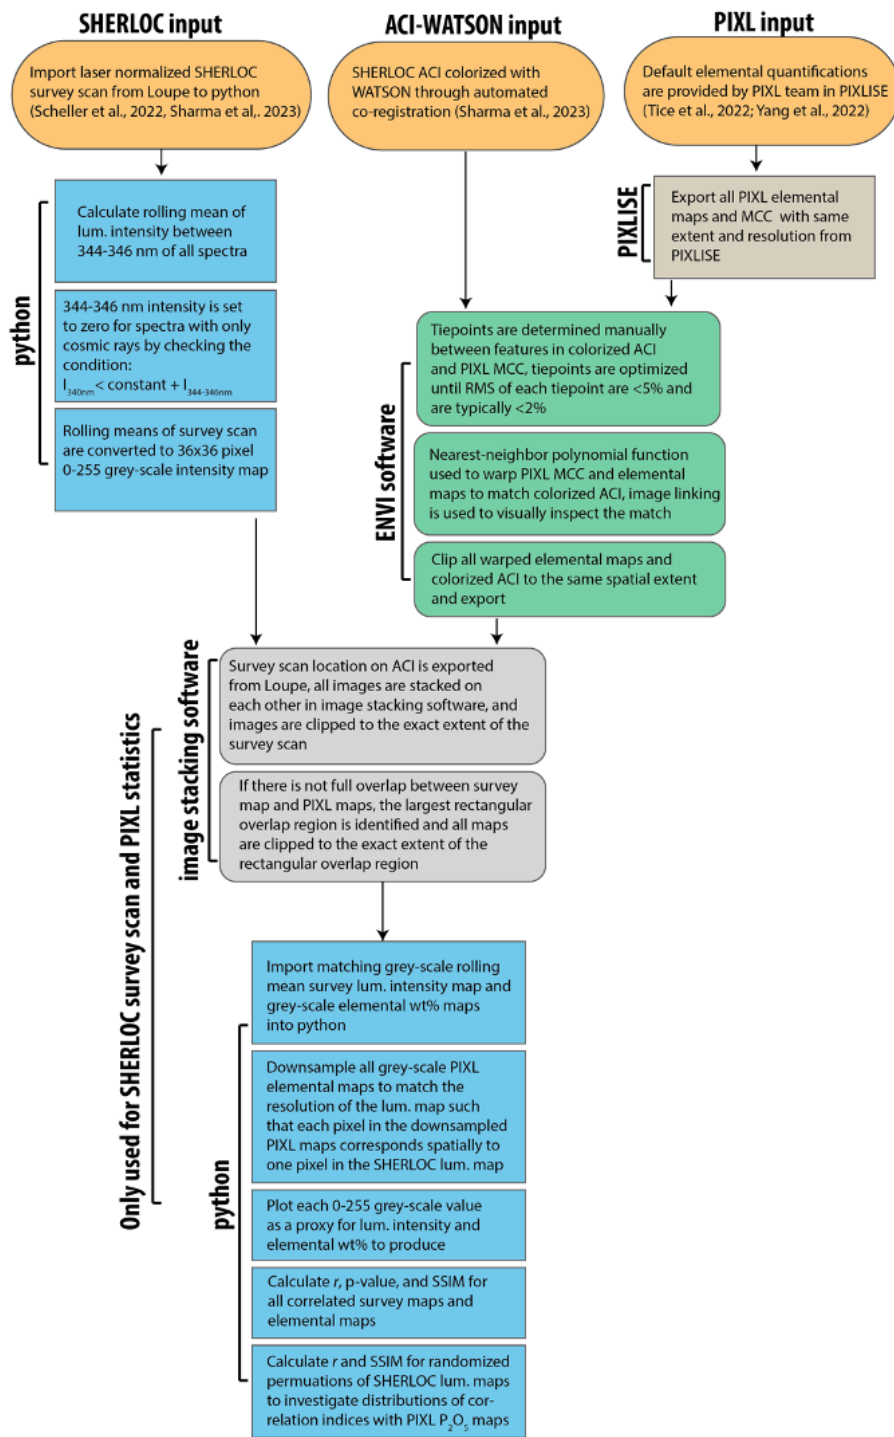

**Table S2.** Summary of correlation statistics between all other PIXL elemental maps and SHERLOC 330-350 nm luminescence intensity maps following same methods as in Table 3. We evaluate the same statistical metrics,  $r$ ,  $p$ -value, and  $SSIM$ , for 330-350 nm luminescence intensity correlations to all PIXL elemental wt% maps. When  $r$  is 0.4 or  $r$  is -0.4 and the associated  $p$ -value is  $<10^{-3}$ , we indicate that there is a correlation as strong as the weakest  $P_2O_5$  correlation (in the Alfalfa target).

| Target                         | $r$  | $p$ -value        | $SSIM$ | Correlation |
|--------------------------------|------|-------------------|--------|-------------|
| <b><i>Bellegarde</i></b>       |      |                   |        |             |
| SiO <sub>2</sub>               | 0.1  | 10 <sup>-2</sup>  | 0      | None        |
| Al <sub>2</sub> O <sub>3</sub> | 0    | 10 <sup>-1</sup>  | 0      | None        |
| CaO                            | 0.2  | 10 <sup>-15</sup> | 0.2    | None        |
| Na <sub>2</sub> O              | 0    | 10 <sup>-1</sup>  | 0.2    | None        |
| K <sub>2</sub> O               | 0.1  | 10 <sup>-5</sup>  | 0.1    | None        |
| FeO <sub>T</sub>               | -0.2 | 10 <sup>-7</sup>  | -0.1   | None        |
| MgO                            | -0.1 | 10 <sup>-2</sup>  | 0      | None        |
| SO <sub>3</sub>                | -0.2 | 10 <sup>-7</sup>  | 0      | None        |
| Cl                             | 0    | 10 <sup>-1</sup>  | 0      | None        |
| <b><i>Alfalfa</i></b>          |      |                   |        |             |
| SiO <sub>2</sub>               | 0    | 10 <sup>-1</sup>  | 0      | None        |
| Al <sub>2</sub> O <sub>3</sub> | -0.1 | 10 <sup>-3</sup>  | 0      | None        |
| CaO                            | 0    | 10 <sup>-1</sup>  | -0.1   | None        |
| Na <sub>2</sub> O              | -0.1 | 10 <sup>-3</sup>  | 0      | None        |
| K <sub>2</sub> O               | 0.1  | 10 <sup>-3</sup>  | 0.1    | None        |
| FeO <sub>T</sub>               | 0    | 10 <sup>-1</sup>  | 0.1    | None        |
| MgO                            | 0    | 10 <sup>-1</sup>  | 0.1    | None        |
| SO <sub>3</sub>                | 0    | 10 <sup>-1</sup>  | 0      | None        |
| Cl                             | 0.1  | 10 <sup>-2</sup>  | 0.1    | None        |
| <b><i>Montpezat</i></b>        |      |                   |        |             |
| SiO <sub>2</sub>               | 0.1  | 10 <sup>-1</sup>  | 0      | None        |



|                                    |             |                         |             |                 |
|------------------------------------|-------------|-------------------------|-------------|-----------------|
| Al <sub>2</sub> O <sub>3</sub>     | 0.2         | 10 <sup>-4</sup>        | 0.1         | None            |
| CaO                                | 0.1         | 10 <sup>-1</sup>        | 0           | None            |
| Na <sub>2</sub> O                  | 0.2         | 10 <sup>-5</sup>        | 0.1         | None            |
| K <sub>2</sub> O                   | 0.2         | 10 <sup>-3</sup>        | 0.2         | None            |
| FeO <sub>T</sub>                   | -0.1        | 10 <sup>-2</sup>        | 0           | None            |
| MgO                                | -0.2        | 10 <sup>-7</sup>        | -0.1        | None            |
| SO <sub>3</sub>                    | 0.1         | 10 <sup>-1</sup>        | 0.2         | None            |
| Cl                                 | 0           | 1                       | 0           | None            |
| <i><b>Dourbes<br/>Scan 1</b></i>   |             |                         |             |                 |
| SiO <sub>2</sub>                   | 0.1         | 10 <sup>-4</sup>        | 0           | None            |
| <b>Al<sub>2</sub>O<sub>3</sub></b> | <b>0.4</b>  | <b>10<sup>-23</sup></b> | <b>0.4</b>  | <b>Positive</b> |
| CaO                                | 0.1         | 10 <sup>-2</sup>        | 0.3         | None            |
| Na <sub>2</sub> O                  | 0.3         | 10 <sup>-17</sup>       | 0.5         | None            |
| <b>K<sub>2</sub>O</b>              | <b>0.4</b>  | <b>10<sup>-23</sup></b> | <b>0.5</b>  | <b>Positive</b> |
| FeO <sub>T</sub>                   | -0.2        | 10 <sup>-8</sup>        | -0.1        | None            |
| MgO                                | -0.3        | 10 <sup>-15</sup>       | -0.1        | None            |
| SO <sub>3</sub>                    | 0.1         | 10 <sup>-1</sup>        | 0.5         | None            |
| Cl                                 | 0           | 10 <sup>-1</sup>        | 0.3         | None            |
| <i><b>Dourbes<br/>Scan 2</b></i>   |             |                         |             |                 |
| SiO <sub>2</sub>                   | 0.2         | 10 <sup>-6</sup>        | 0.1         | None            |
| <b>Al<sub>2</sub>O<sub>3</sub></b> | <b>0.4</b>  | <b>10<sup>-22</sup></b> | <b>0.3</b>  | <b>Positive</b> |
| <b>CaO</b>                         | <b>0.5</b>  | <b>10<sup>-51</sup></b> | <b>0.4</b>  | <b>Positive</b> |
| <b>Na<sub>2</sub>O</b>             | <b>0.5</b>  | <b>10<sup>-47</sup></b> | <b>0.3</b>  | <b>Positive</b> |
| <b>K<sub>2</sub>O</b>              | <b>0.6</b>  | <b>10<sup>-62</sup></b> | <b>0.3</b>  | <b>Positive</b> |
| <i>FeO<sub>T</sub></i>             | <i>-0.5</i> | <i>10<sup>-39</sup></i> | <i>-0.1</i> | <i>Negative</i> |
| <i>MgO</i>                         | <i>-0.5</i> | <i>10<sup>-44</sup></i> | <i>-0.1</i> | <i>Negative</i> |

|                                |      |                  |     |      |
|--------------------------------|------|------------------|-----|------|
| SO <sub>3</sub>                | -0.1 | 10 <sup>-2</sup> | 0.1 | None |
| Cl                             | 0    | 10 <sup>-1</sup> | 0   | None |
| <i>Quartier</i>                |      |                  |     |      |
| SiO <sub>2</sub>               | -0.1 | 10 <sup>-1</sup> | 0.1 | None |
| Al <sub>2</sub> O <sub>3</sub> | 0.2  | 10 <sup>-7</sup> | 0.3 | None |
| CaO                            | 0.2  | 10 <sup>-9</sup> | 0.3 | None |
| Na <sub>2</sub> O              | 0.1  | 10 <sup>-3</sup> | 0.2 | None |
| K <sub>2</sub> O               | 0.1  | 10 <sup>-5</sup> | 0.4 | None |
| FeO <sub>T</sub>               | 0    | 10 <sup>-1</sup> | 0   | None |
| MgO                            | -0.2 | 10 <sup>-7</sup> | 0   | None |
| SO <sub>3</sub>                | -0.1 | 10 <sup>-2</sup> | 0.1 | None |
| Cl                             | 0.2  | 10 <sup>-8</sup> | 0.4 | None |

**Fig. S10:** Calculated Pearson's  $r$  index values for random permutations of each paired SHERLOC luminescence and PIXL  $P_2O_5$  wt% image dataset. The leftmost column represents 100% permutation or completely randomized images. The rightmost column represents randomization of only 10% of the image for a sensitivity check of the method.  $r$  values of the measured data are written for each dataset for comparison. Note that  $r$  values of the measured data are well-above the distribution of index values from 100% and 10% permutation.

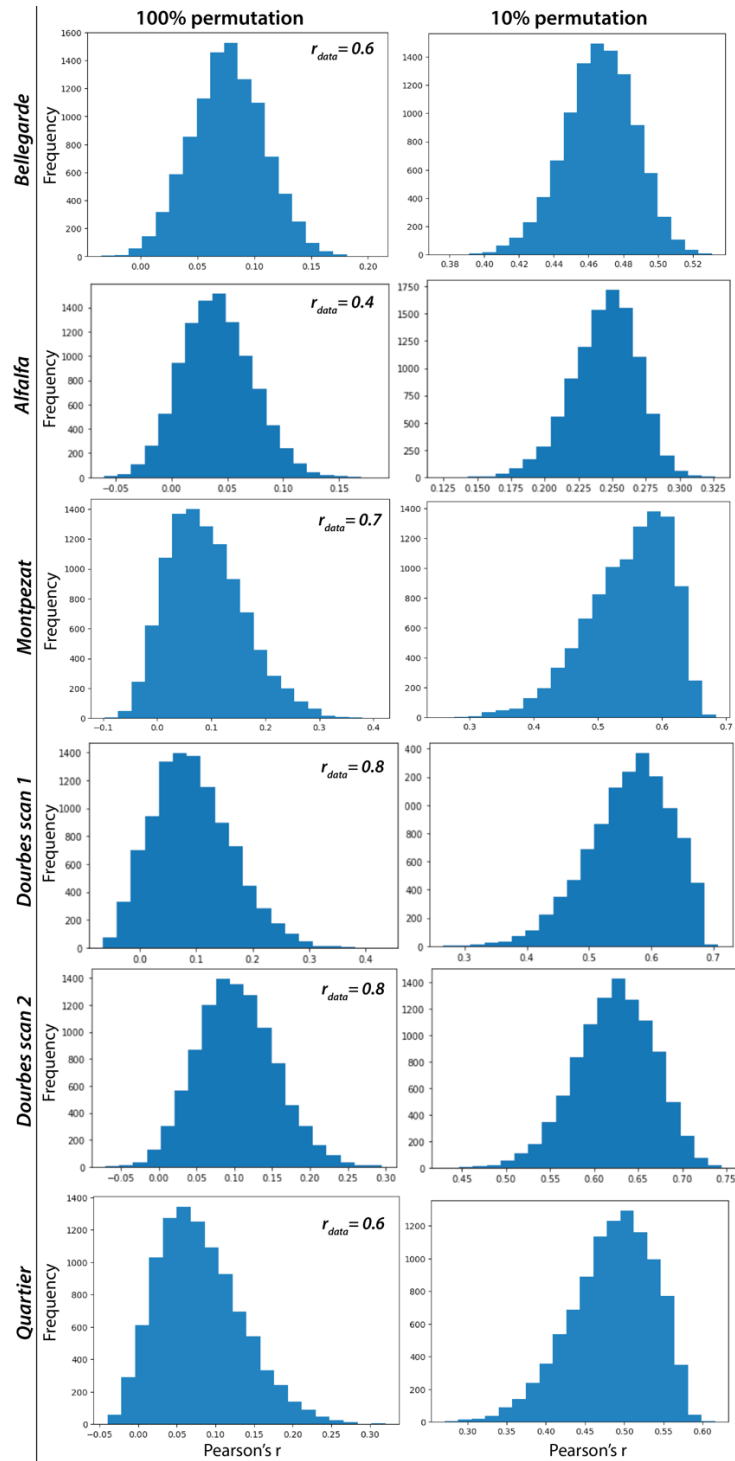

**Fig. S11:** Same as Fig. S10 but repeated for *SSIM* values. Note again that all *SSIM* values of the real data are well-above the distribution of 100% permutation, although this is not the case for some of the 10% permutation distributions.

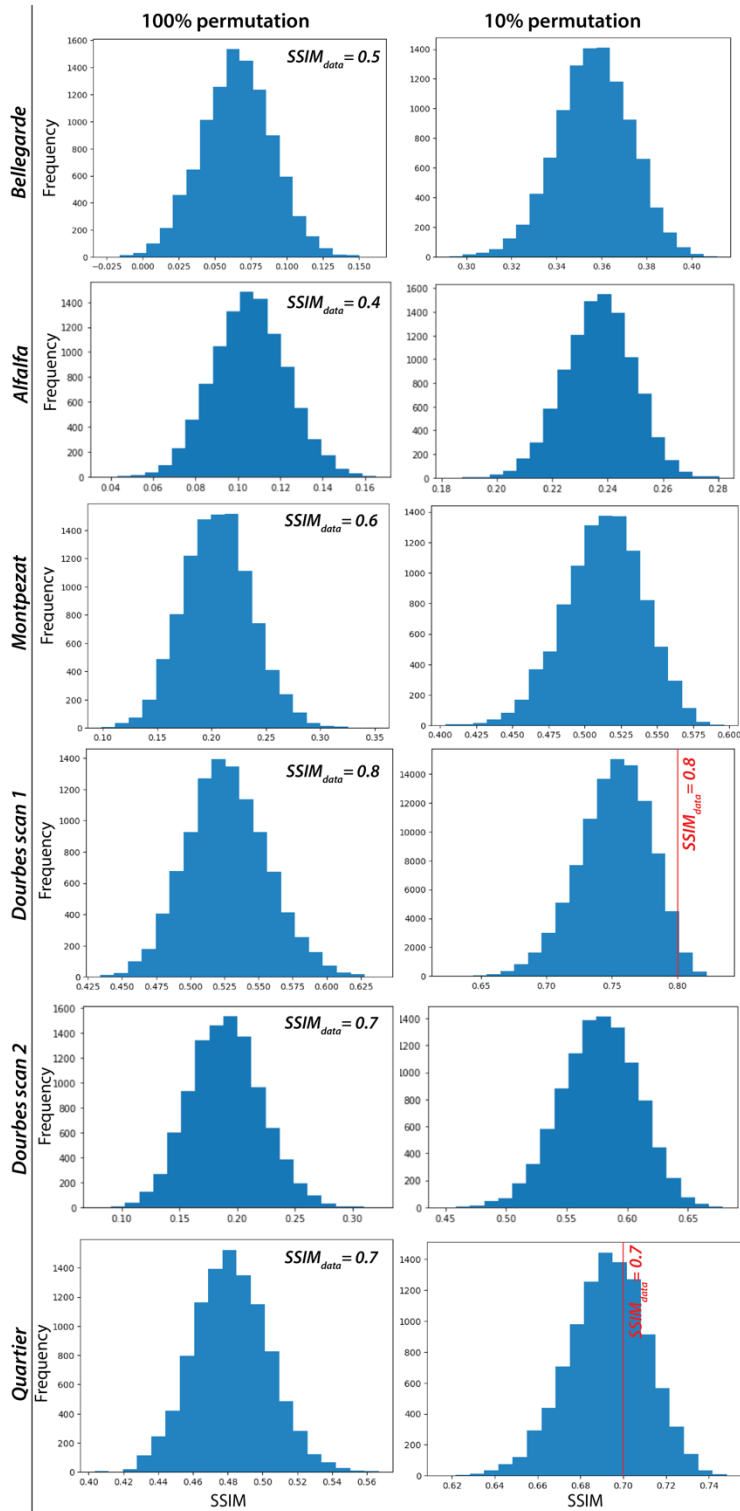

**Table S3.** Correlation statistics for 270-290 nm luminescence maps and all PIXL element maps. There is no clear indication of a statistically significant correlation between 270-290 nm luminescence as reflected in Fig. 8. However, a slightly positive and statistically significant  $r$  value can be found for SiO<sub>2</sub> in Bellegarde and for K<sub>2</sub>O and SiO<sub>2</sub> in Alfalfa, which is predicted based on Fig. 8. *SSIM* values, however, do not indicate any enhanced correlation compared with correlations to other elements.

| Target     | $r$<br>(lum.-SiO <sub>2</sub> ) | $p$ -value<br>(lum.-SiO <sub>2</sub> ) | $r$<br>(lum.-K <sub>2</sub> O) | $p$ -value<br>(lum.-K <sub>2</sub> O) | $r$<br>(lum.-element) | <i>SSIM</i><br>(lum.-SiO <sub>2</sub> ) | <i>SSIM</i><br>(lum.-K <sub>2</sub> O) | <i>SSIM</i><br>(lum.-element) |
|------------|---------------------------------|----------------------------------------|--------------------------------|---------------------------------------|-----------------------|-----------------------------------------|----------------------------------------|-------------------------------|
| Bellegarde | 0.2                             | 10 <sup>-9</sup>                       | 0                              | 0.3                                   | 0                     | 0.3                                     | 0                                      | 0-0.3                         |
| Alfalfa    | 0.2                             | 10 <sup>-10</sup>                      | 0.2                            | 10 <sup>-9</sup>                      | <0-0.1                | 0.2                                     | 0.2                                    | 0-0.1                         |
| All        | 0.2                             | 10 <sup>-20</sup>                      | 0.1                            | 10 <sup>-9</sup>                      | 0                     | N/A                                     | N/A                                    | N/A                           |

**Fig. S12:** (A) Summary of SHERLOC 330-350 nm luminescence (stars) and phosphate Raman identifications (yellow circles) overlaid on PIXL  $P_2O_5$  wt% abundance maps. These maps are also displayed in Figs. 6, S4, and S6. All 330-350 nm luminescence features that did not occur with a SHERLOC phosphate Raman detection and were not spatially in the vicinity of PIXL  $P_2O_5$  detections are marked with red stars and an arrow. (B) Display of all spectra marked with a red star and arrow in panel A. (C) FWHM, wavelength position of max. intensity, and max. intensity of points associated with  $P_2O_5$  and a phosphate Raman peak, and neither of those. The selection of points in the analysis here will be affected by uncertainties in the correlation algorithm and projection of X-ray points (Methods). Given that there is no distinguishing metrics observed for spectra here, this observation would extend to any spectra uncorrelated to phosphate Raman peaks and PIXL observed  $P_2O_5$  missed due to uncertainties in correlation and X-ray point projection. This would be most applicable to the Alfalfa target (Methods).

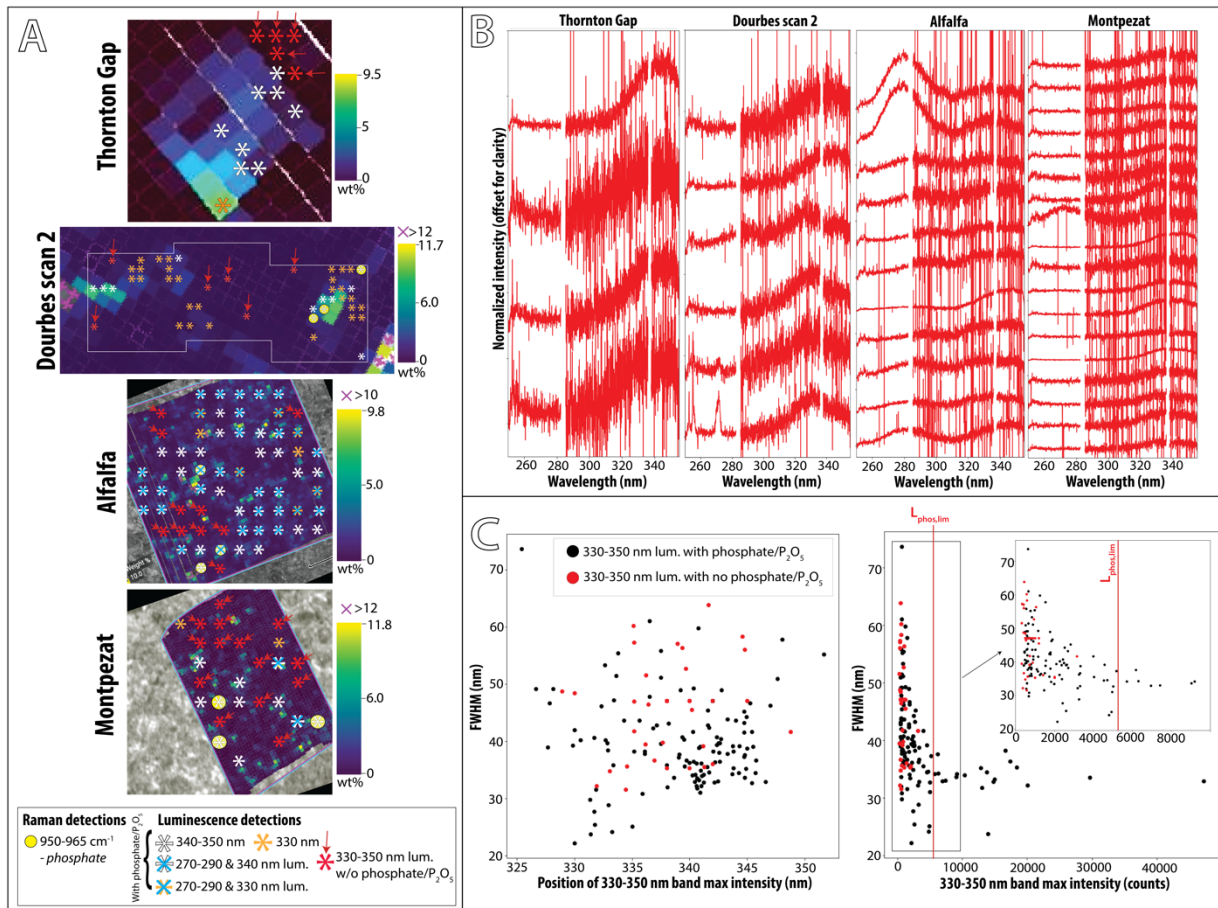

**Fig. S13:** Correlation plots showing max intensity and the wavelength position of max intensity for spectra where a 270-295 nm and a 330-350 nm band occur together in the same spectrum from HDR and detail scans of targets in the Mááz and Séítah fms. Note no observed correlation between 270-295 nm and 330-350 nm luminescence data. Note that Séítah fm targets, Dourbes and Garde, generally have a wavelength position of max intensity at ~290-295 nm, while spectra from the Mááz fm span from 270-295 nm. All targets contain spectra that span from 325-350 nm in association with the 270-295 nm luminescence bands. The Alfalfa target contains the most 270-295 luminescence (Table S1) and the most spectra with coinciding 270-290 nm and 330-350 nm luminescence bands.

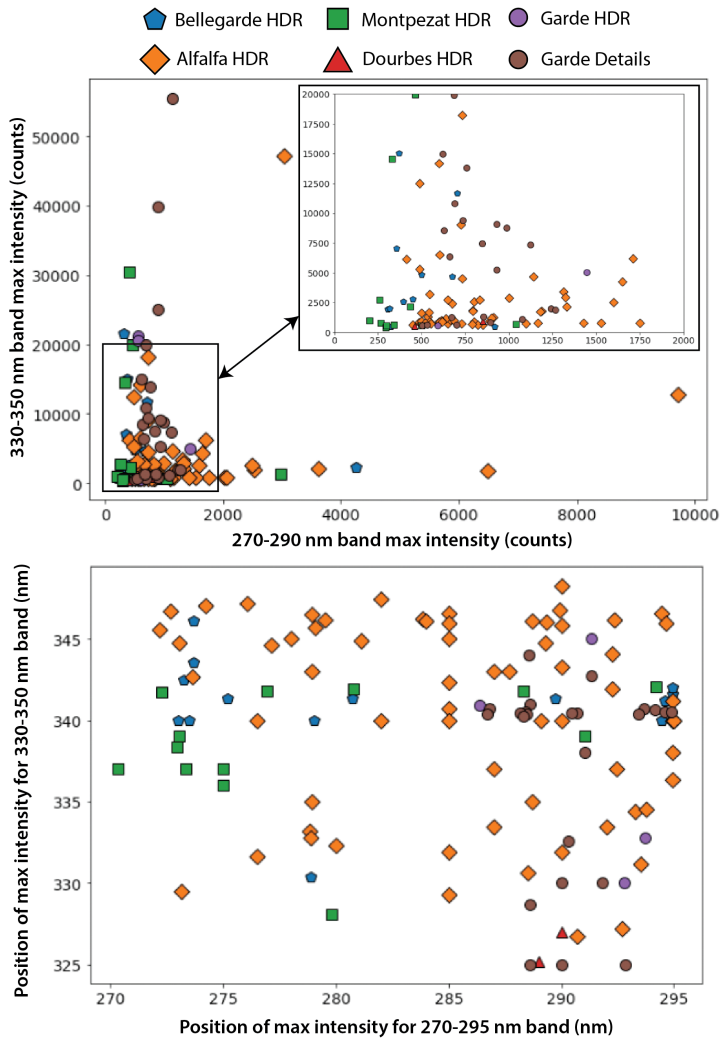

Supplement: sciadv.adm8241_sm.pdf [file sciadv.adm8241_sm.pdf]
